# Supplementary material
Source: Research Square preprint supplement (doi:10.21203/rs.3.rs-8208755/v1)
Supplement: Supplementary file 1 [file 7c1fb2c4b357182c2a9bfdf1.docx]

Corresponds to Manuscript Fig. 7A FXR (Target Protein 70kDa) + GAPDH (36kDa)”；

The left lane corresponds to the target band, while the right lane represents the internal reference band.

lane

**3**

**1**

**2**

**3**

**2**

**1**

**1**


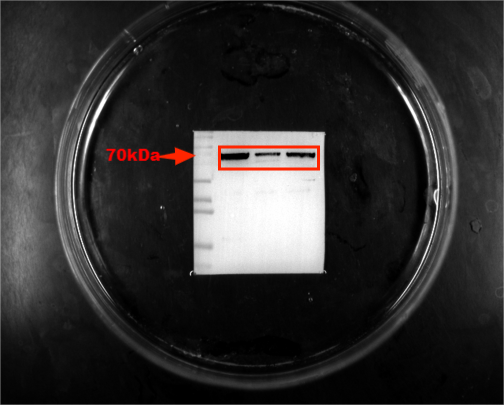

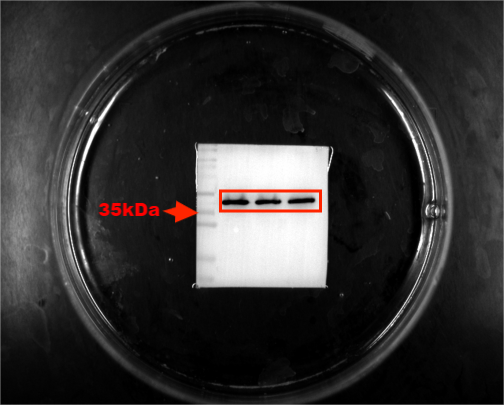


**FXR:70kDa**

**GAPDH：36kDa**

**25**

**35**

**25**

**100**

**100**

**70**

**70**

**55**

**55**

**40**

**35**

**40**

**35**

Replicate experiments of FXR protein expression:

**2**

**1**

**3**

**3**

**2**

**1**


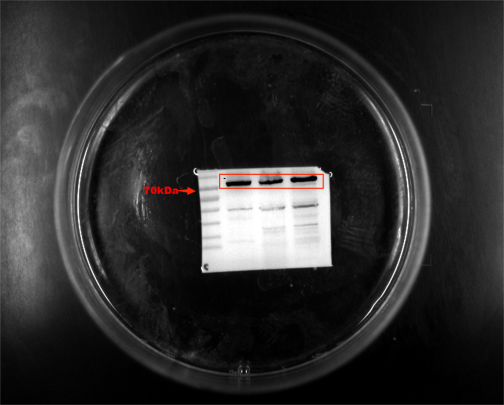

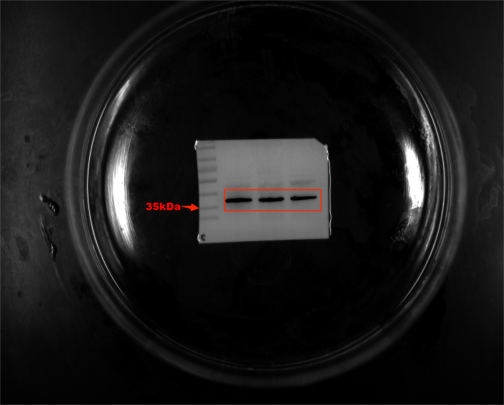


**FXR:70kDa**

**GAPDH：36kDa**

**100**

**100**

**70**

**70**

**55**

**55**

**40**

**40**

**35**

**35**

**3**

**3**

**2**

**2**

**1**

**1**


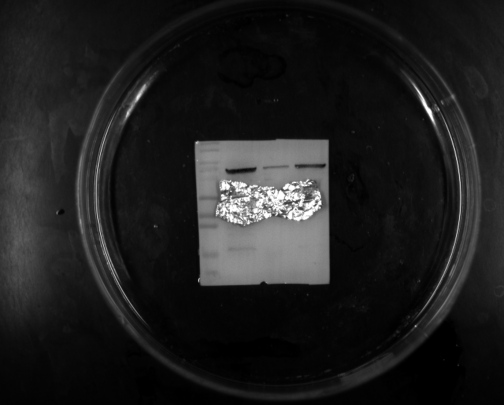

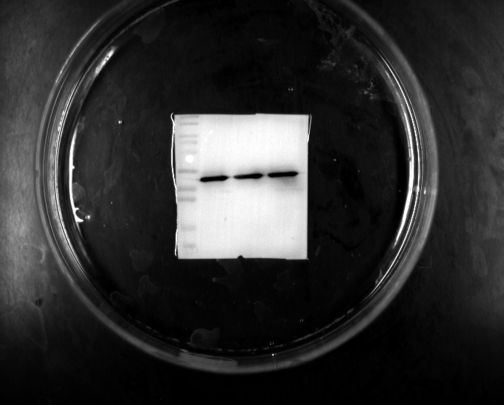


**FXR:70kDa**

**GAPDH：36kDa**

**100**

**70**

**70**

**100**

**55**

**55**

**40**

**40**

**35**

**35**

Corresponds to Manuscript Fig. 7A NFKB P65 (Target Protein 65kDa) + GAPDH (36kDa)”；The left lane corresponds to the target band, while the right lane represents the internal reference band.

lane

**3**

**3**

**2**

**2**

**1**

**1**


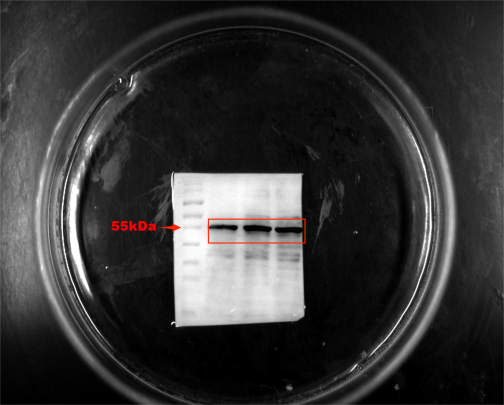

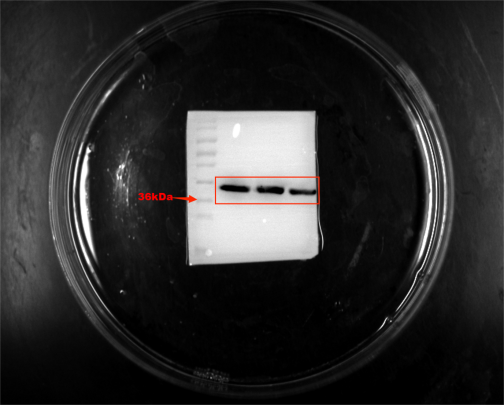


**NF-κB P65:**

**65kDa**

**GAPDH：36kDa**

**130**

**130**

**100**

**100**

**70**

**70**

**55**

**55**

**40**

**40**

**35**

**35**

Replicate experiments of NFKB P65 protein expression:

**1**

**3**

**3**

**2**

**2**

**1**


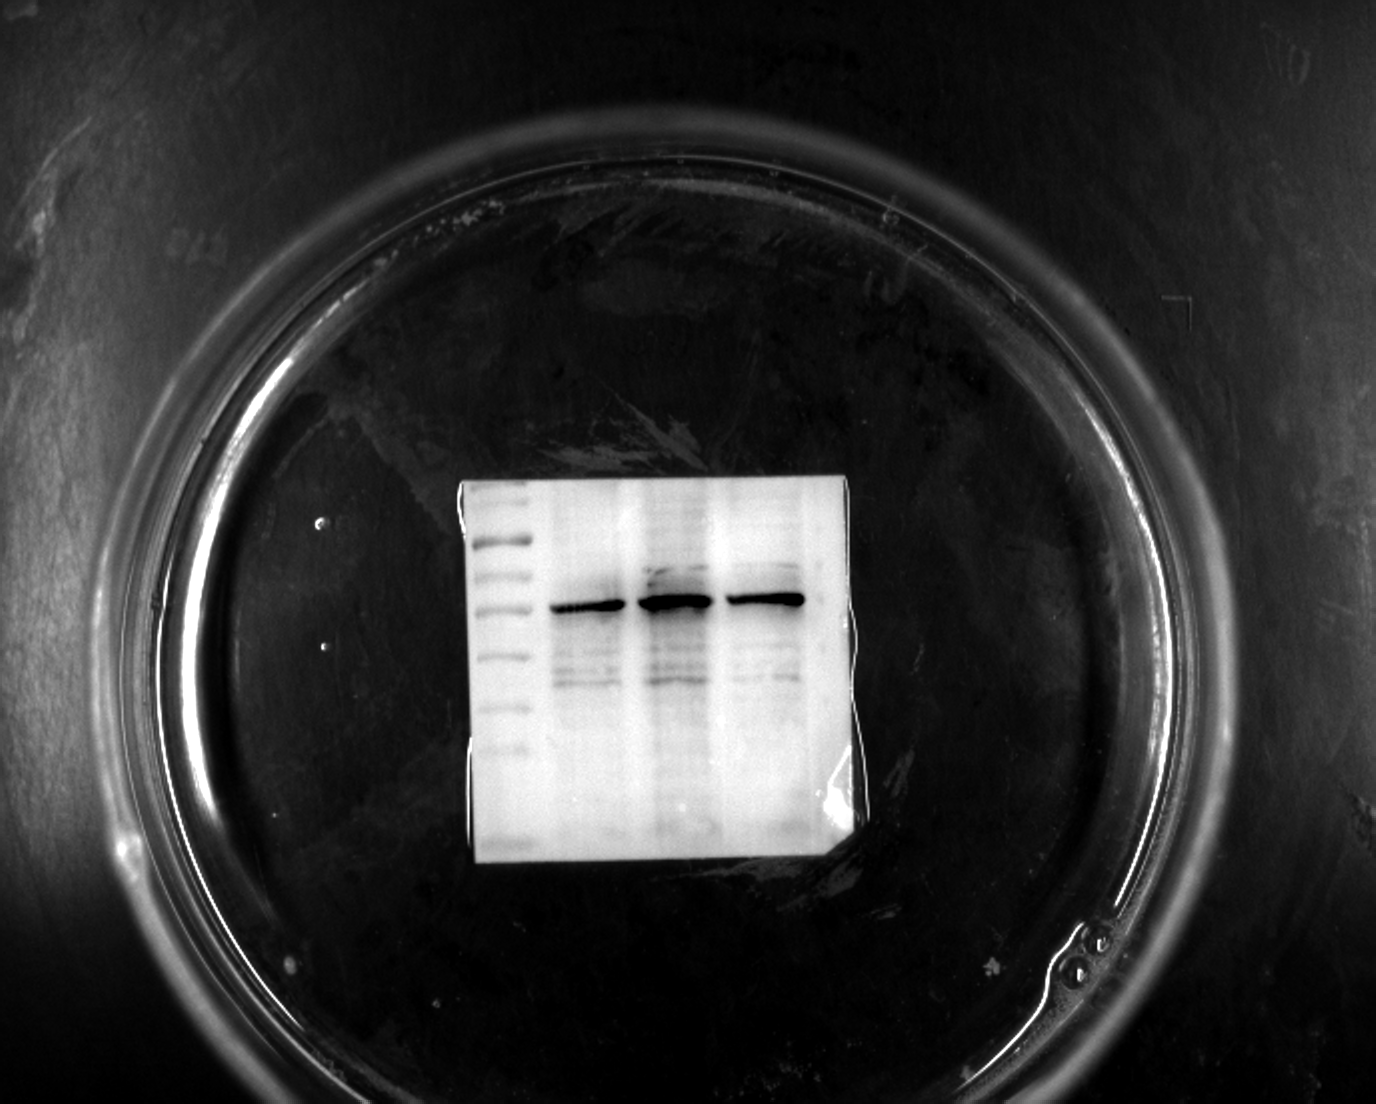

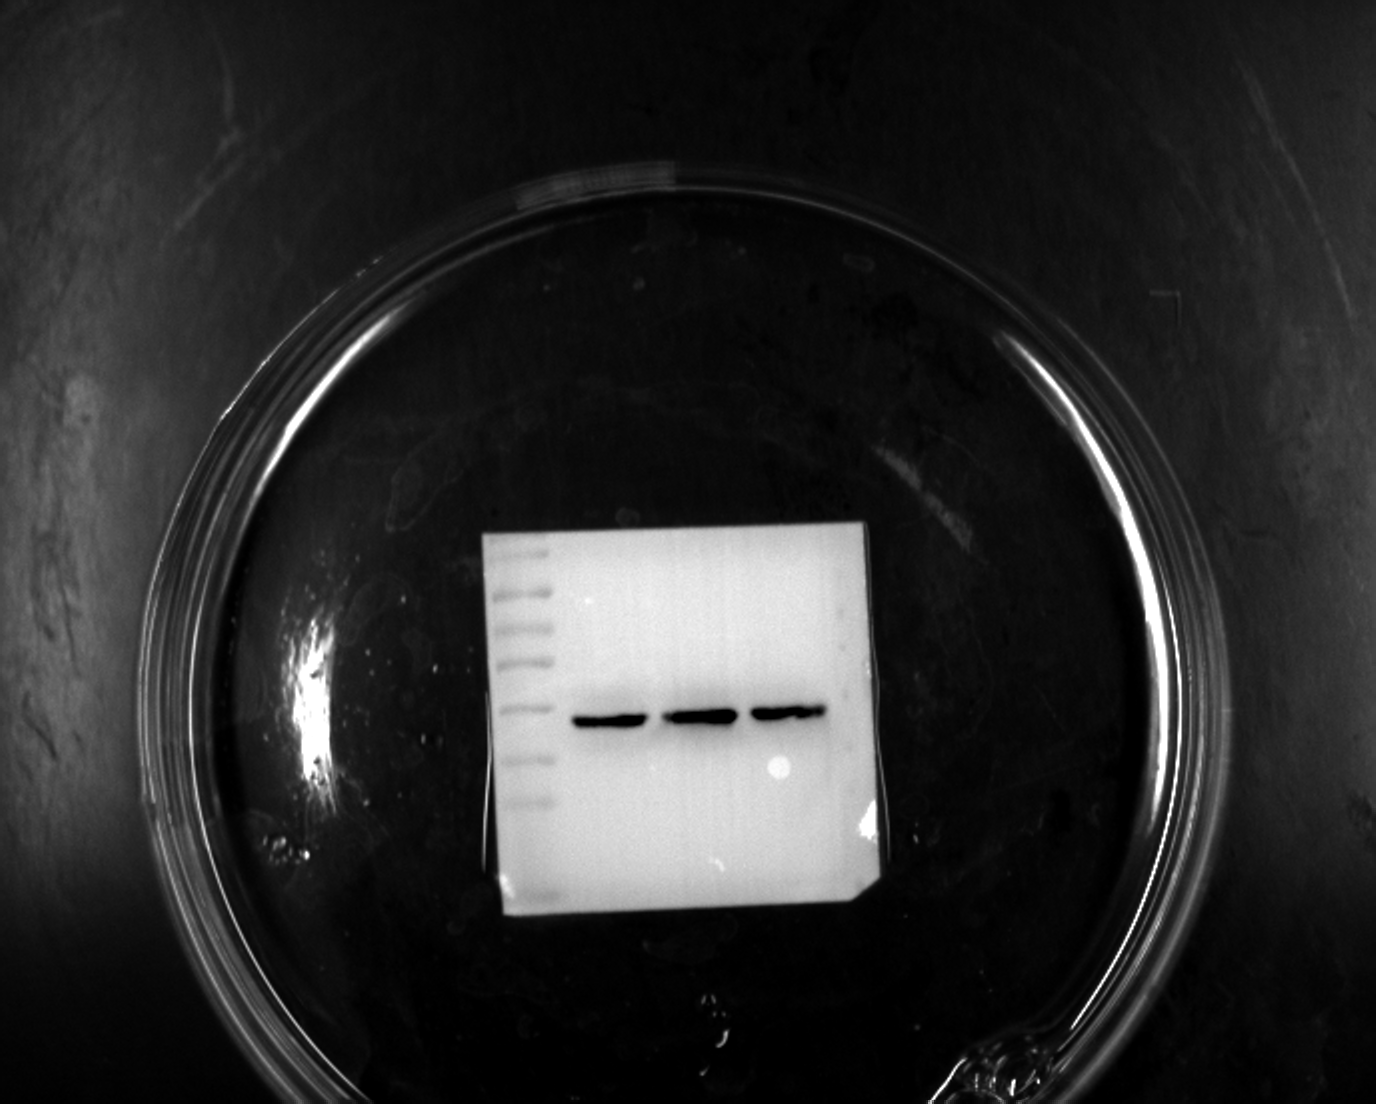


**NF-κB P65:**

**65kDa**

**GAPDH：36kDa**

**130**

**130**

**100**

**100**

**70**

**70**

**55**

**55**

**40**

**40**

**35**

**35**

**3**

**3**

**2**

**2**

**1**

**1**


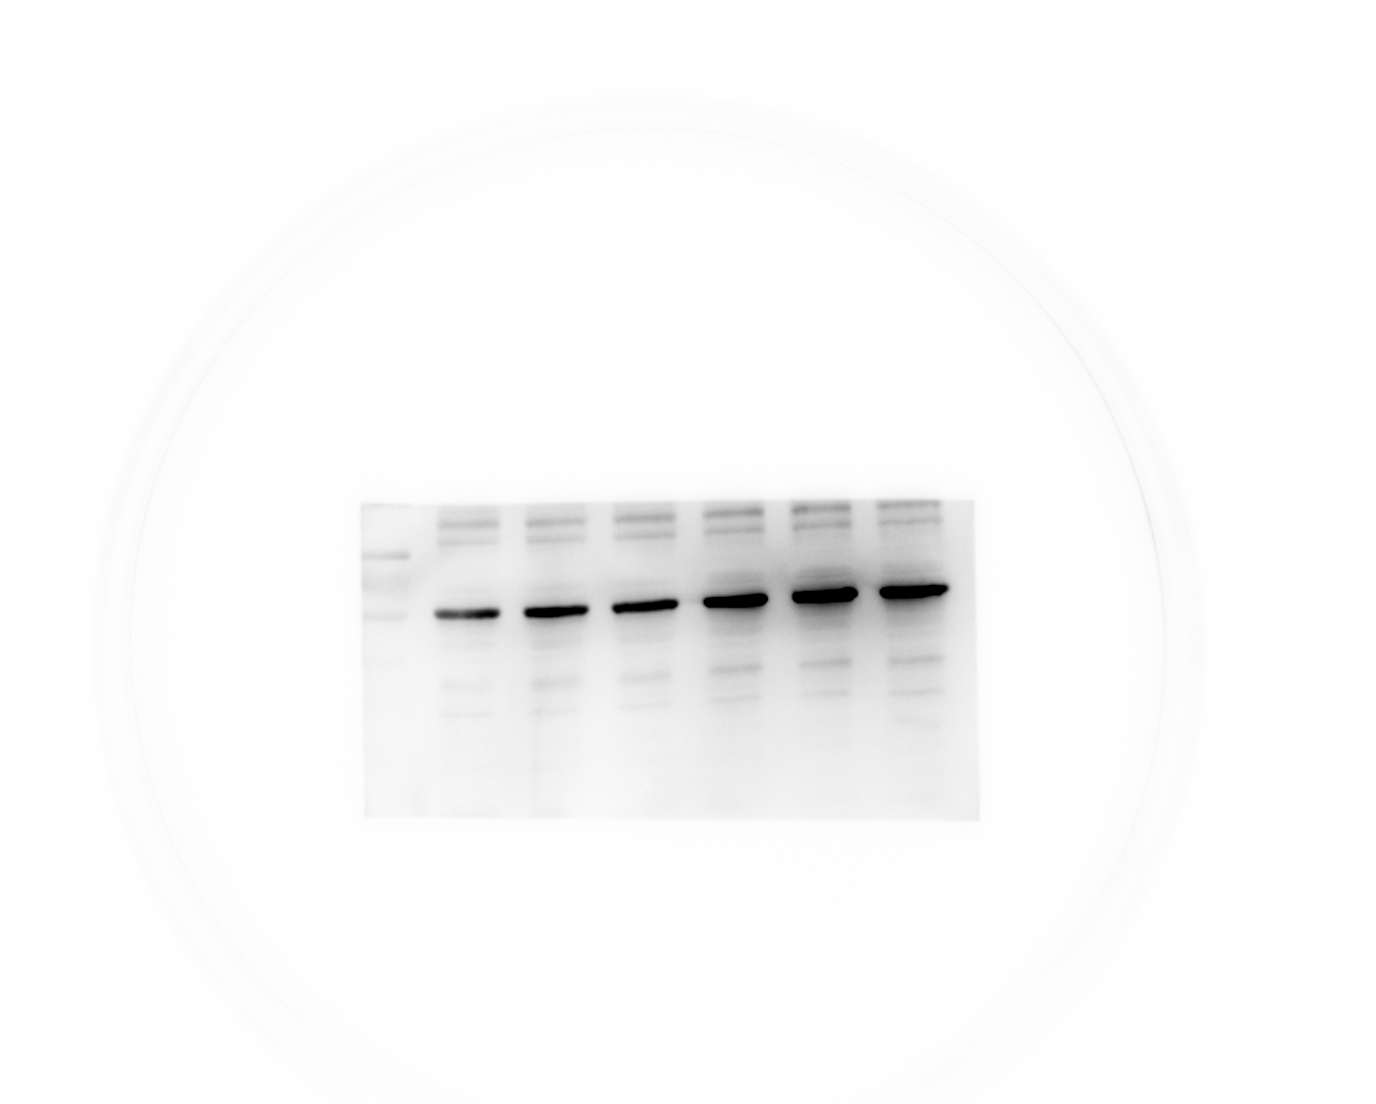

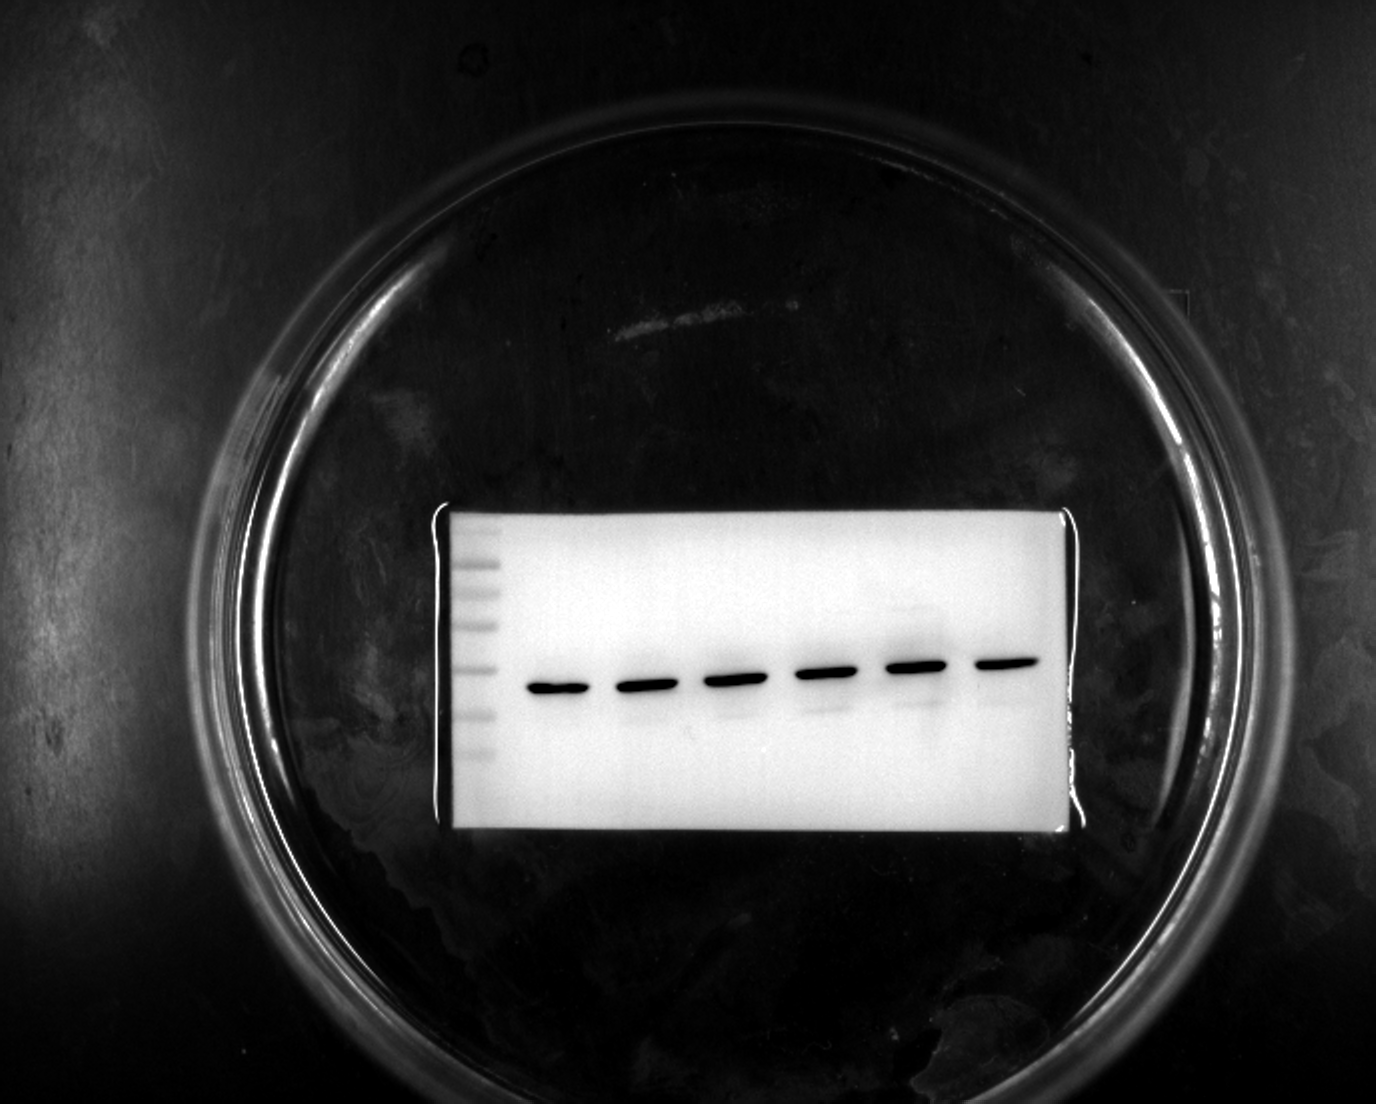


**NF-κB P65:**

**65kDa**

**GAPDH：36kDa**

**130**

**130**

**100**

**100**

**70**

**70**

**35**

**55**

**55**

**40**

**40**

**35**

Corresponds to Manuscript Fig. 7A TLR4 (Target Protein 95kDa) + GAPDH (36kDa)”；The left lane corresponds to the target band, while the right lane represents the internal reference band.

**1**

Lane

**3**

**2**

**2**

**1**

**3**


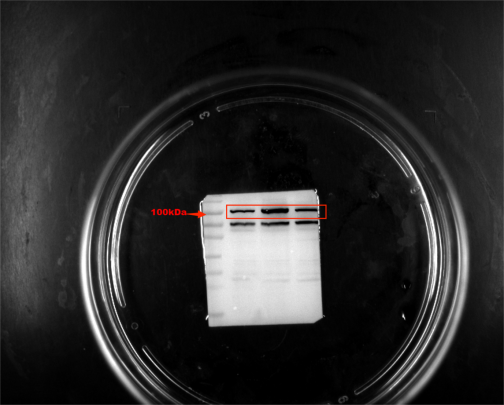

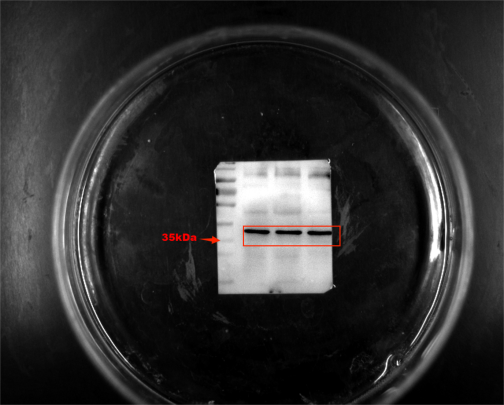


**TLR4：**

**95kDa**

**GAPDH：36kDa**

**35**

**35**

**40**

**40**

**55**

**55**

**70**

**70**

**100**

**130**

**100**

**130**

Replicate experiments of TLR4 protein expression:

**2**

**1**

**3**

**2**

**1**

**3**


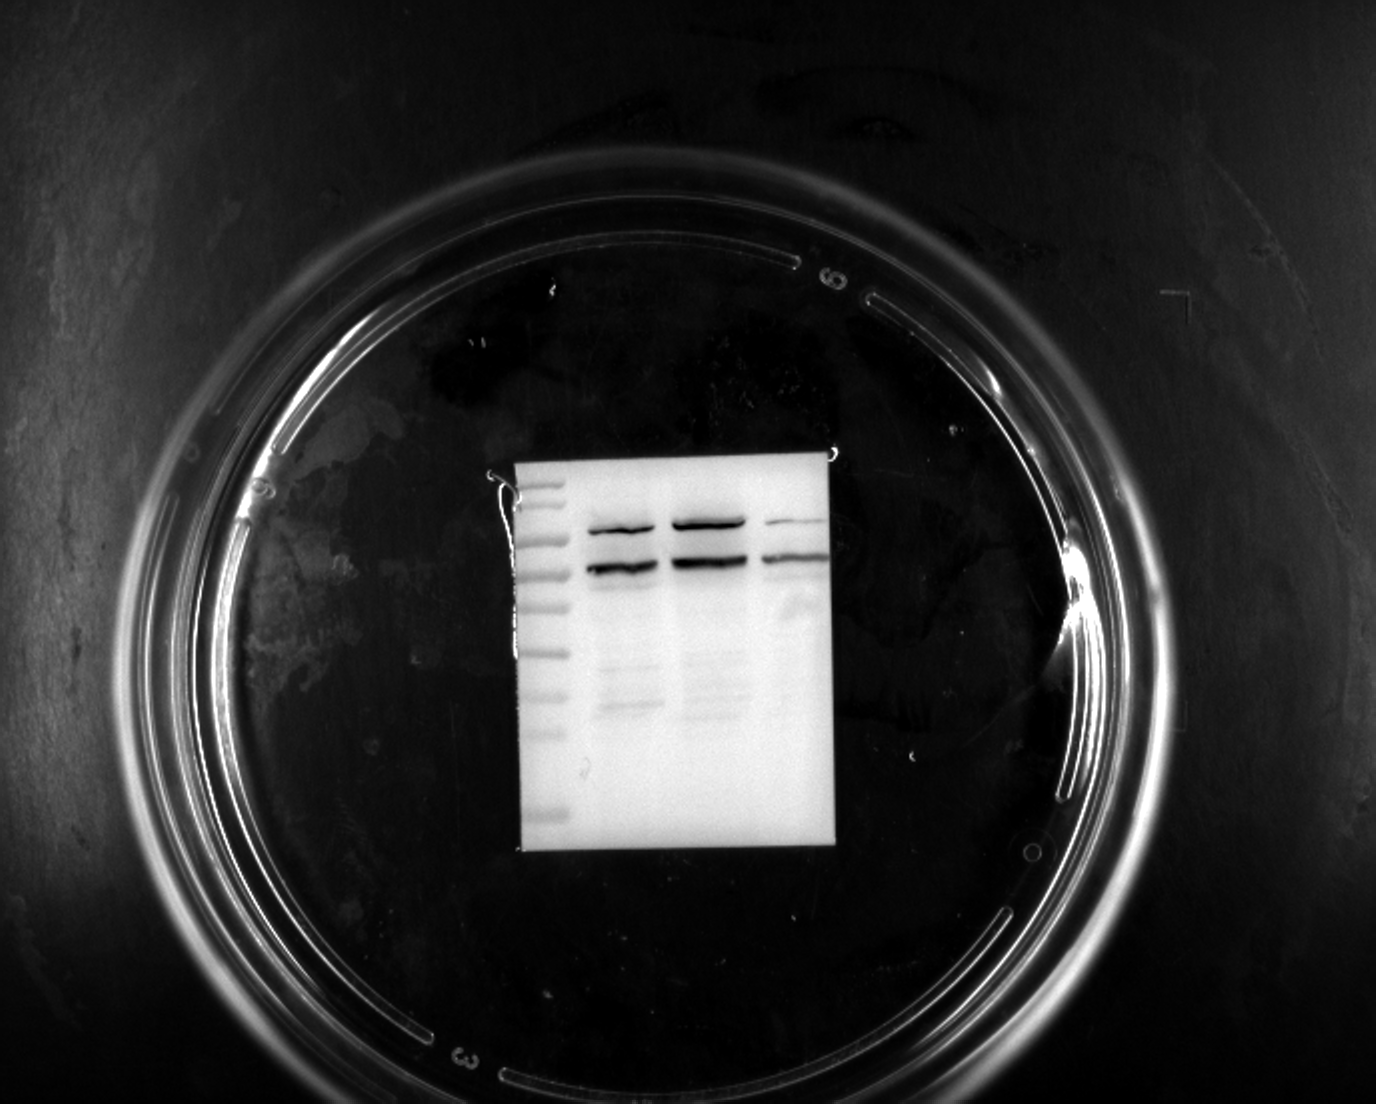

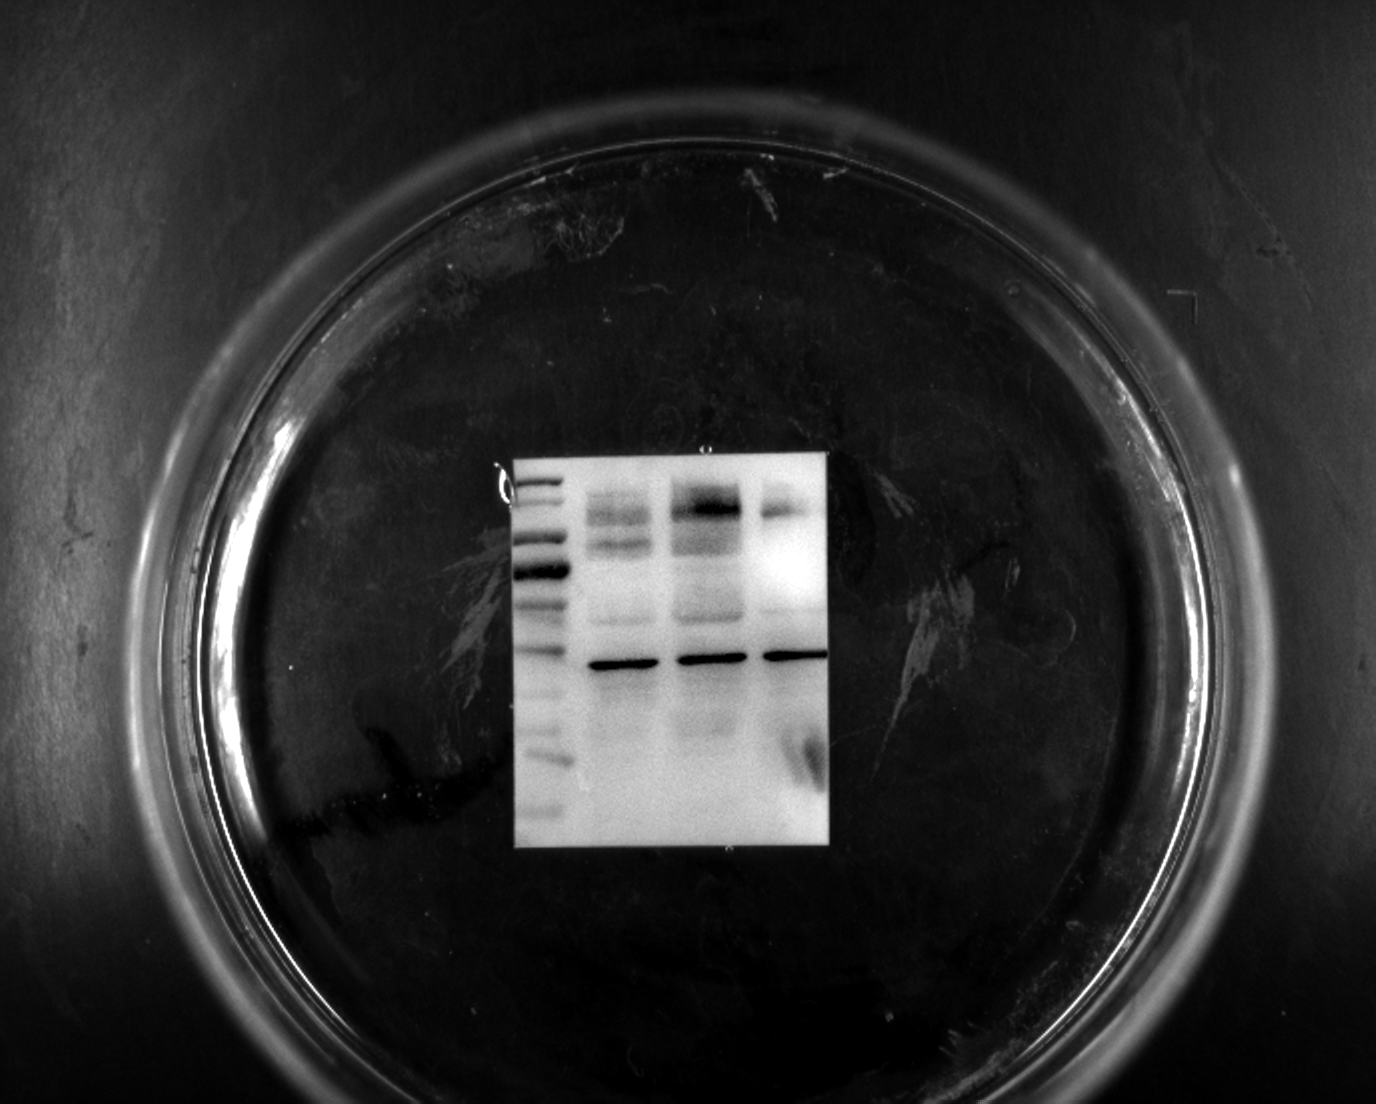


**TLR4：**

**95kDa**

**GAPDH：36kDa**

**35**

**35**

**40**

**40**

**55**

**55**

**70**

**70**

**100**

**100**

**130**

**130**

**2**

**1**

**3**

**2**

**1**

**3**


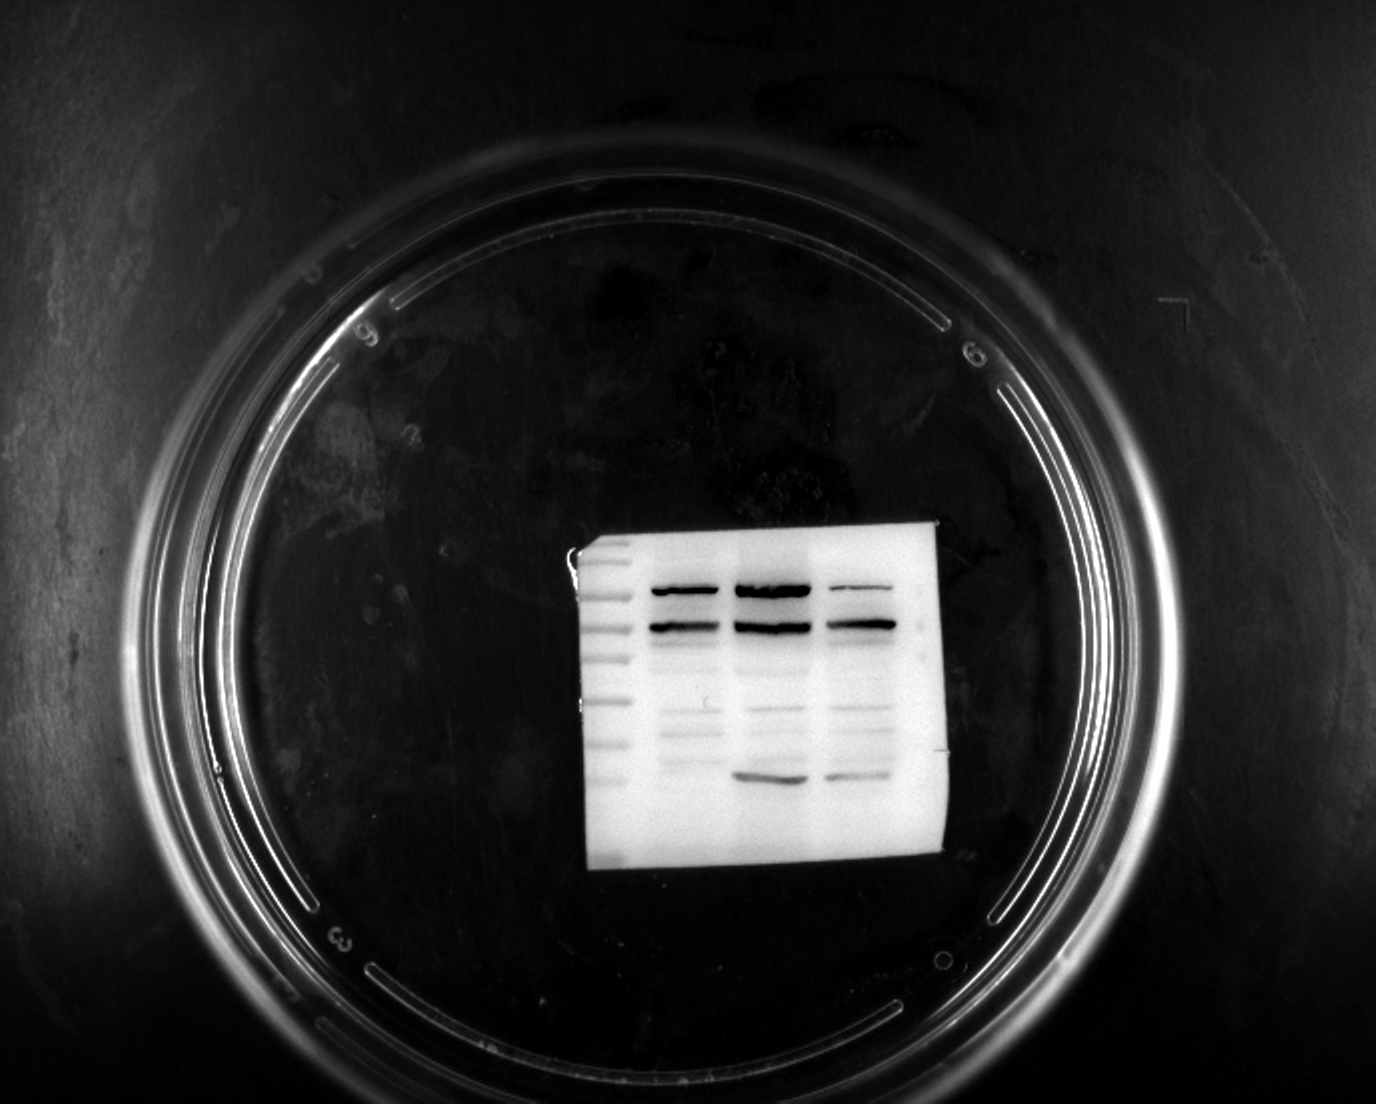

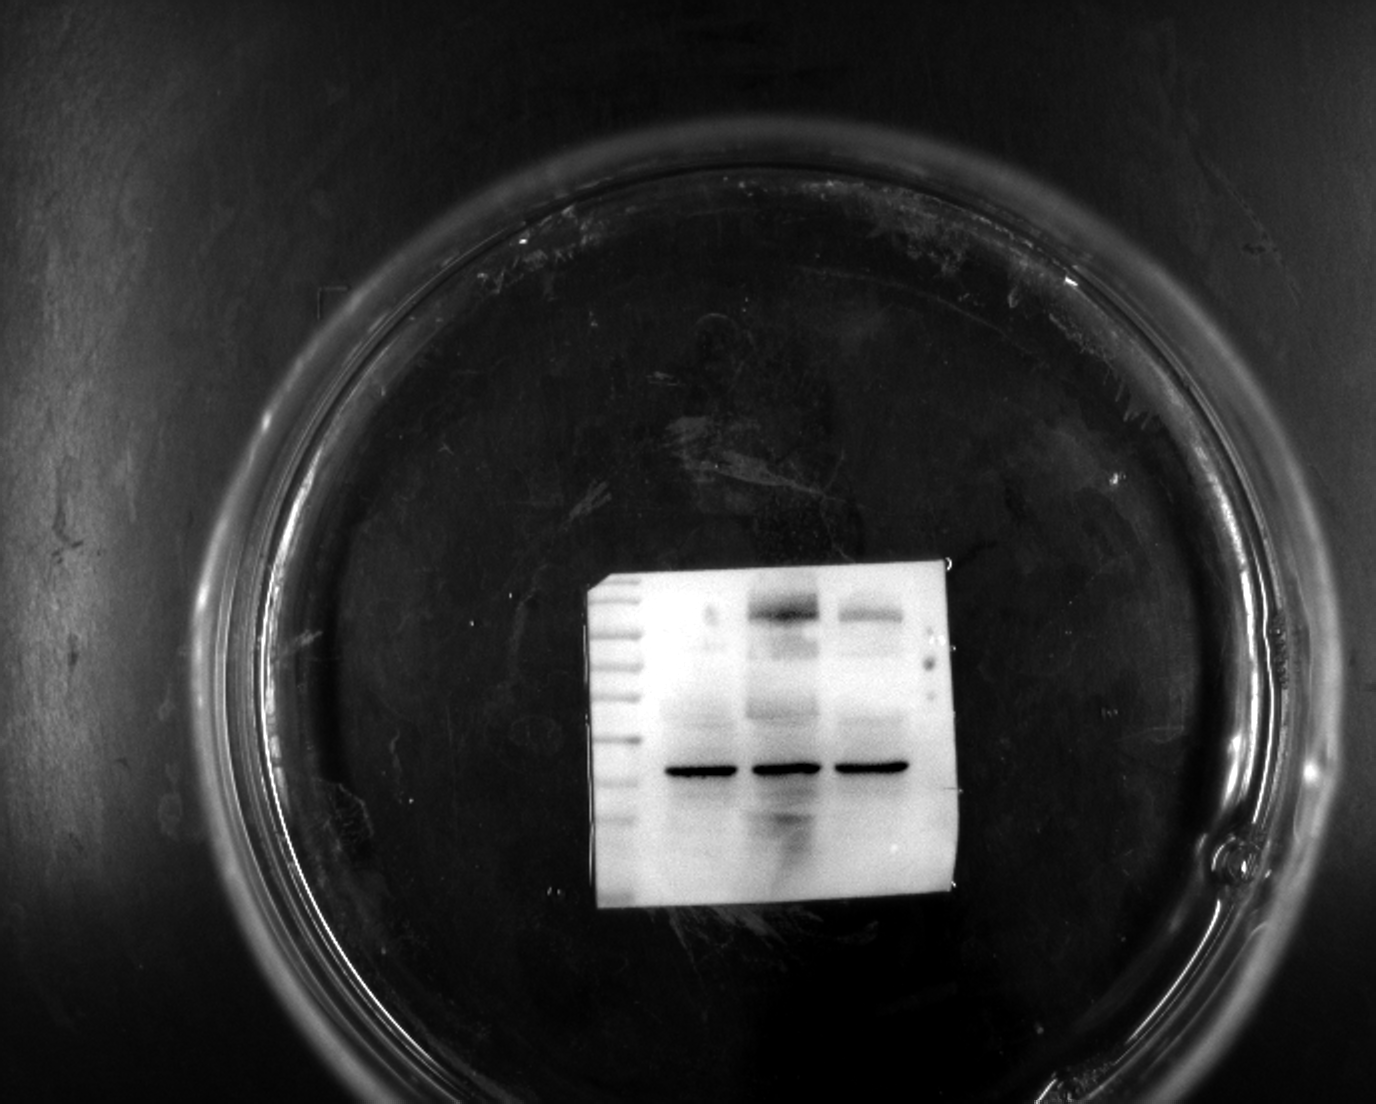


**TLR4：**

**95kDa**

**GAPDH：36kDa**

**35**

**40**

**35**

**55**

**55**

**70**

**70**

**100**

**130**

**100**

**130**
